# Supplementary material for: “Post-GDM support would be really good for mothers”: A qualitative interview study exploring how to support a healthy diet and physical activity after gestational diabetes
Source: PubMed Central journal article supplement (PMC8782419; doi:10.1371/journal.pone.0262852), 2022-01-21
Supplement: pone.0262852.s002.pdf [file pone.0262852.s002.pdf]

# **“Post-GDM support would be really good for mothers”: a qualitative interview study exploring how to support a healthy diet and physical activity after gestational diabetes**

R A Dennison, S J Griffin, J A Usher-Smith, R A Fox, C E Aiken, C L Meek

**Table S2. Thematic framework used to analyse the DAiSIeS interviews.**

|                                                                                                                                                                                                                                                                                                                                                                                                                                                                                                                                                                                                                                                                                                                                                                                                                                                                                                                                                                                                                                                                                                                                                                                                                                                                                                                                                                                                                                                                                                                                                                                                                                                                                                                                                                                                                                                                 |
|-----------------------------------------------------------------------------------------------------------------------------------------------------------------------------------------------------------------------------------------------------------------------------------------------------------------------------------------------------------------------------------------------------------------------------------------------------------------------------------------------------------------------------------------------------------------------------------------------------------------------------------------------------------------------------------------------------------------------------------------------------------------------------------------------------------------------------------------------------------------------------------------------------------------------------------------------------------------------------------------------------------------------------------------------------------------------------------------------------------------------------------------------------------------------------------------------------------------------------------------------------------------------------------------------------------------------------------------------------------------------------------------------------------------------------------------------------------------------------------------------------------------------------------------------------------------------------------------------------------------------------------------------------------------------------------------------------------------------------------------------------------------------------------------------------------------------------------------------------------------|
| <p><b>1. Diet and exercise</b></p> <ul style="list-style-type: none"><li>a. Diet<ul style="list-style-type: none"><li>i. General comments</li><li>ii. Prompted suggestion card #6 Advice about how to have a healthy diet</li><li>iii. Unprompted suggestions</li></ul></li><li>b. Exercise<ul style="list-style-type: none"><li>i. General comments</li><li>ii. Prompted #5 Help for you to exercise with others</li><li>iii. Prompted #7 Advice about how to exercise with a busy schedule</li><li>iv. Unprompted suggestions</li></ul></li><li>c. Information and understanding<ul style="list-style-type: none"><li>i. General comments</li><li>ii. Prompted #1 More information about the impact of healthy diet/exercise on your diabetes risk</li><li>iii. Prompted #2 More information about the impact of healthy diet/exercise on your wider health</li><li>iv. Unprompted suggestions</li></ul></li><li>d. Family<ul style="list-style-type: none"><li>i. General comments</li><li>ii. Prompted #3 More information about the impact of healthy diet/exercise on your family</li><li>iii. Prompted #4 Suggested ways for your children and wider family to be healthier</li><li>iv. Unprompted suggestions</li></ul></li><li>e. Money<ul style="list-style-type: none"><li>i. General comments</li><li>ii. Prompted #9 Advice about saving money and healthy diet/exercise</li><li>iii. Unprompted suggestions</li></ul></li><li>f. Sustainability<ul style="list-style-type: none"><li>i. General comments</li><li>ii. Prompted #8 Advice about how to keep going with healthy changes to your diet/exercise</li><li>iii. Unprompted suggestions</li></ul></li><li>g. Monitoring<ul style="list-style-type: none"><li>i. General comments</li><li>ii. Prompted #10 Monitoring your progress</li><li>iii. Unprompted suggestions</li></ul></li></ul> |
| <p><b>2. Diabetes screening</b></p> <p><i>Reported separately</i></p>                                                                                                                                                                                                                                                                                                                                                                                                                                                                                                                                                                                                                                                                                                                                                                                                                                                                                                                                                                                                                                                                                                                                                                                                                                                                                                                                                                                                                                                                                                                                                                                                                                                                                                                                                                                           |

### **3. Other**

- i. Pregnancy
- ii. Mode of delivery
- iii. Source and who
- iv. When
- v. Suggested content of a postpartum appointment
- vi. Sensitivity and non-judgemental attitude
- vii. General postpartum experience
- viii. Other

*Framework analysis charts were drawn for each second-level item (indicated by letters a–g). #N indicates the number of the suggestion card referred to.*
