# Supplementary material for: “Post-GDM support would be really good for mothers”: A qualitative interview study exploring how to support a healthy diet and physical activity after gestational diabetes
Source: PubMed Central journal article supplement (PMC8782419; doi:10.1371/journal.pone.0262852), 2022-01-21
Supplement: pone.0262852.s003.pdf [file pone.0262852.s003.pdf]

# “Post-GDM support would be really good for mothers”: a qualitative interview study exploring how to support a healthy diet and physical activity after gestational diabetes

R A Dennison, S J Griffin, J A Usher-Smith, R A Fox, C E Aiken, C L Meek

**Table S3. DAiSiES participants’ agreement with whether the suggestion cards will support healthy diet and physical activity.**

| Participant      | Suggestion card                                     |                                                         |                                                   |                                     |                                    |                                      |                                                 |                                    |                              |                                      | Overall response |
|------------------|-----------------------------------------------------|---------------------------------------------------------|---------------------------------------------------|-------------------------------------|------------------------------------|--------------------------------------|-------------------------------------------------|------------------------------------|------------------------------|--------------------------------------|------------------|
|                  | 1. More information about diet/exercise on T2D risk | 2. More information about diet/exercise on wider health | 3. More information about diet/exercise on family | 4. Suggestions for healthy families | 5. Support to exercise with others | 6. Advice about how to eat healthily | 7. Advice about exercising with a busy schedule | 8. Advice about sustaining changes | 9. Advice about saving money | 10. Advice about monitoring progress |                  |
| P1               | x                                                   | x                                                       | x                                                 | x                                   | x                                  | ✓                                    | ✓                                               | ✓                                  | ✓                            | ✓                                    | M                |
| P2               | x                                                   | x                                                       | ✓                                                 | ✓                                   | ✓                                  | ✓                                    | ✓                                               | ✓                                  | x                            | ✓                                    | A                |
| P3               | x                                                   | x                                                       | x                                                 | x                                   | x                                  | x                                    | x                                               | x                                  | x                            | x                                    | D                |
| P4               | ✓                                                   | ✓                                                       | ✓                                                 | ✓                                   | ✓                                  | ✓                                    | ✓                                               | ✓                                  | ✓                            | ✓                                    | A                |
| P5               | ✓                                                   | x                                                       | x                                                 | x                                   | x                                  | ✓                                    | x                                               | ✓                                  | x                            | ✓                                    | M                |
| P6               | ✓                                                   | ✓                                                       | ✓                                                 | ✓                                   | x                                  | x                                    | ✓                                               | ✓                                  | ✓                            | ✓                                    | A                |
| P7               | ✓                                                   |                                                         |                                                   | ✓                                   | ✓                                  | ✓                                    | ✓                                               | ✓                                  | x                            | ✓                                    | A                |
| P8               | ✓                                                   | ✓                                                       | ✓                                                 | ✓                                   | ✓                                  | ✓                                    | ✓                                               | ✓                                  | ✓                            | ✓                                    | A                |
| P9               | ✓                                                   | ✓                                                       | ✓                                                 | ✓                                   | ✓                                  | x                                    | ✓                                               | ✓                                  | ✓                            | ✓                                    | A                |
| P10              | ✓                                                   | ✓                                                       | ✓                                                 | ✓                                   | ✓                                  | ✓                                    | ✓                                               | ✓                                  | ✓                            | ✓                                    | A                |
| P11              | ✓                                                   | ✓                                                       | ✓                                                 | ✓                                   | x                                  | ✓                                    | ✓                                               | ✓                                  | ✓                            | ✓                                    | A                |
| P12              | ✓                                                   | x                                                       | x                                                 | x                                   | ✓                                  | ✓                                    | ✓                                               | x                                  | ✓                            |                                      | M                |
| P13              | ✓                                                   | ✓                                                       | ✓                                                 | ✓                                   | ✓                                  | ✓                                    | ✓                                               | ✓                                  | ✓                            | ✓                                    | A                |
| P14              | x                                                   | ✓                                                       | ✓                                                 | ✓                                   | ✓                                  | ✓                                    | ✓                                               | ✓                                  | ✓                            | ✓                                    | A                |
| P15              | ✓                                                   |                                                         | x                                                 | x                                   | ✓                                  | ✓                                    | ✓                                               | ✓                                  | ✓                            | ✓                                    | A                |
| P16              | ✓                                                   | ✓                                                       |                                                   | ✓                                   | ✓                                  | ✓                                    | ✓                                               |                                    | ✓                            | ✓                                    | A                |
| P17              | ✓                                                   | x                                                       | x                                                 | x                                   | ✓                                  | x                                    | ✓                                               | ✓                                  | x                            | ✓                                    | M                |
| P18              | ✓                                                   | ✓                                                       |                                                   | ✓                                   |                                    | ✓                                    |                                                 |                                    |                              | ✓                                    | A                |
| P19              | ✓                                                   | ✓                                                       | x                                                 | x                                   | x                                  | ✓                                    | ✓                                               | ✓                                  | ✓                            | ✓                                    | A                |
| P20              | x                                                   | x                                                       | x                                                 | x                                   | ✓                                  | ✓                                    | ✓                                               | x                                  | x                            | x                                    | D                |
| Overall response | A                                                   | M                                                       | M                                                 | M                                   | A                                  | A                                    | A                                               | A                                  | M                            | A                                    |                  |

Agreement was based on the authors’ interpretation of their responses. Not all participants were shown each card, and some did not comment or agreement was unclear.

Dark green: strongly agree; green: agree; red: disagree; dark red: strongly disagree; grey: not shown or agreement is unclear.

A: overall agreement; M: overall mixed response; D: overall disagreement.
